# Supplementary material for: The in situ growth of CuO nanostructures on an ITO substrate and its application as a highly sensitive electrode for the electrochemical determination of N-acetyl-l-cysteine
Source: Royal Society of Chemistry journal article supplement (doi:10.1039/c6tc04611h), 2017-01-01
Supplement: c6tc04611h1.pdf [file c6tc04611h1.pdf]

## SUPPLEMENTARY DATA

**In-situ growth of CuO nanostructures on ITO substrate and its application as highly sensitive electrode for the electrochemical determination of N-Acetyl-L-cysteine**

**Figure S1**

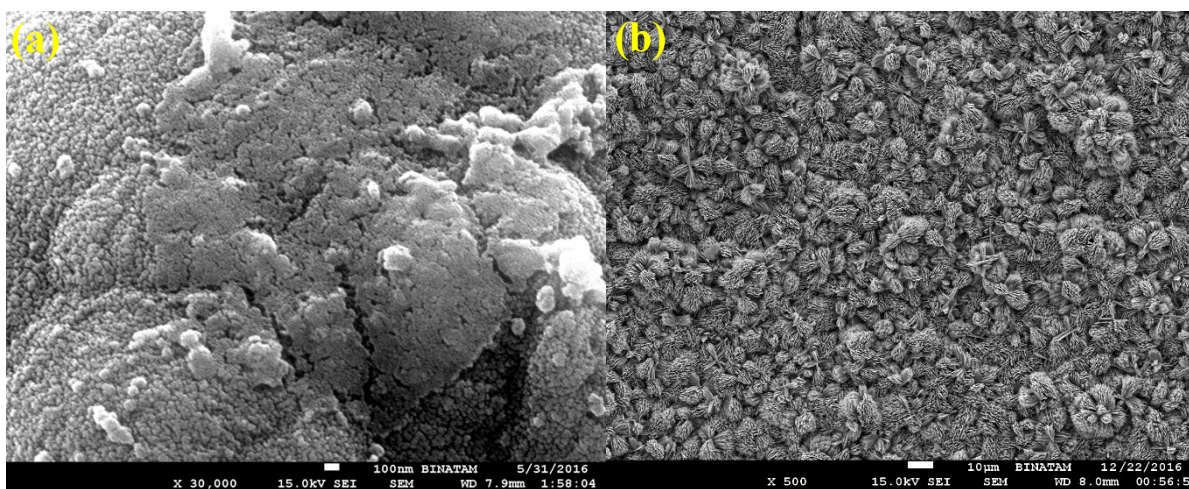

**Figure S1** (a) HR-SEM image for in-situ grown CuO without the assistance of succinic acid as modifier and (b) CuO/ITO prepared under controlled experiment without the application of paper tape to cover the ITO electrode.

**Figure S2**

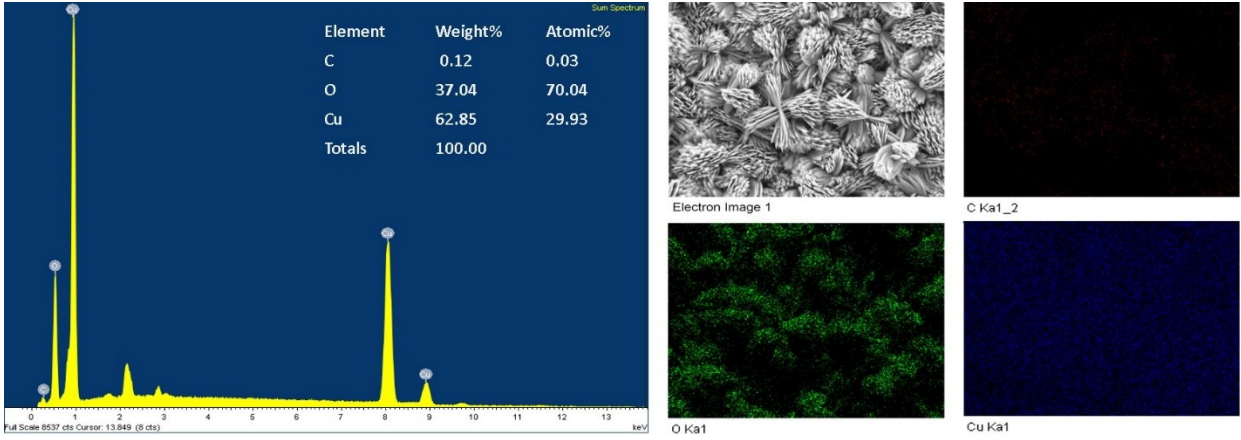

**Figure S2** The EDX analysis with elemental mapping of in-situ grown CuO nanostructures.

Figure S3

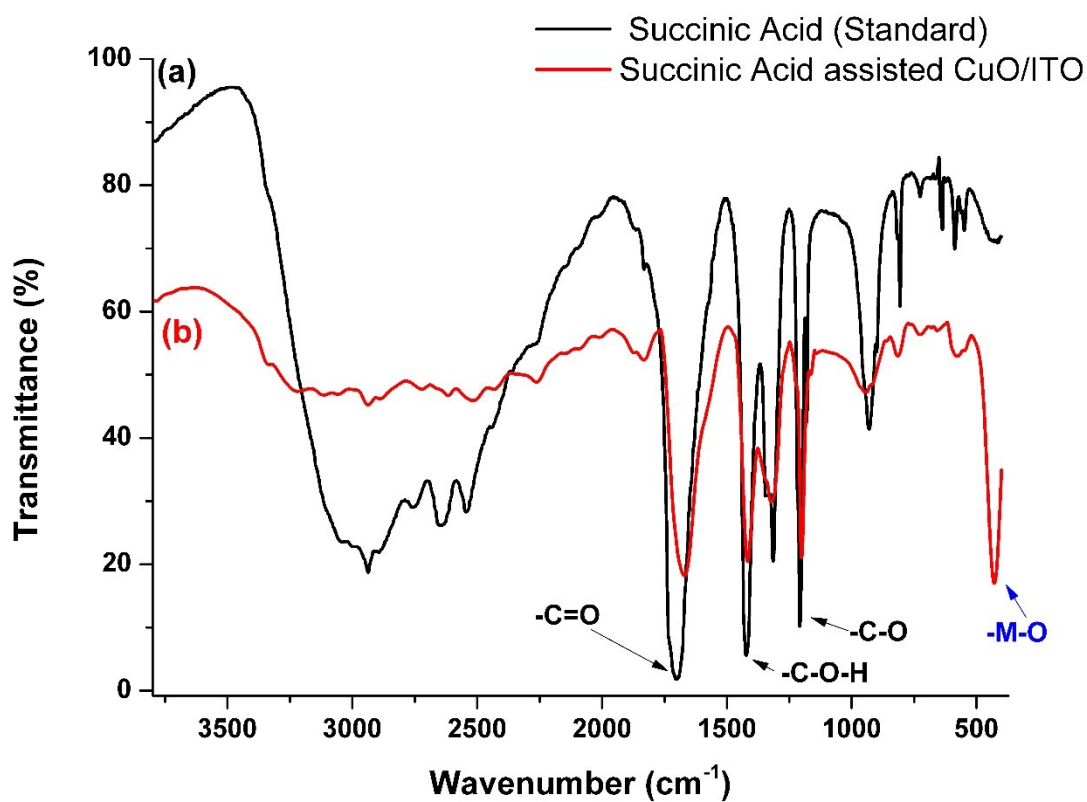

Figure S3 FTIR spectrum of (a) pure succinic acid in comparison to (b) succinic acid assisted CuO nanostructures.

Figure S4

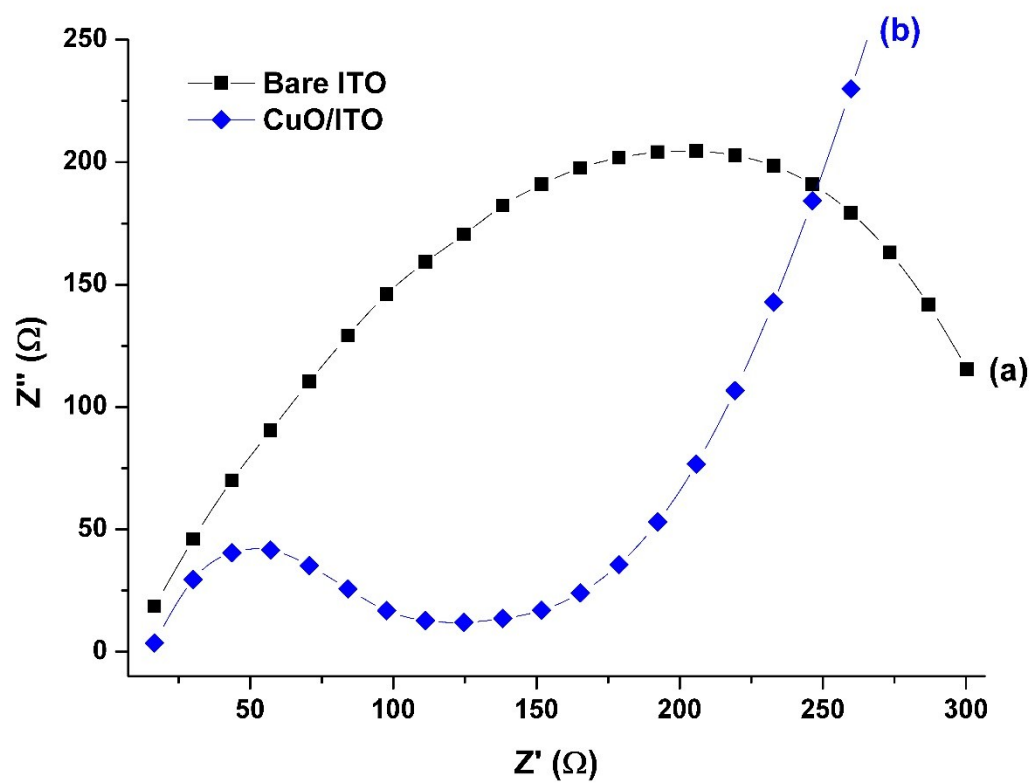

Figure S4 Electrochemical impedance spectra in  $0.01\mu\text{M}$  NAC with  $0.1\text{ M}$  PBS (pH 5.5) at (a) bare ITO and (b) CuO/ITO

Figure S5

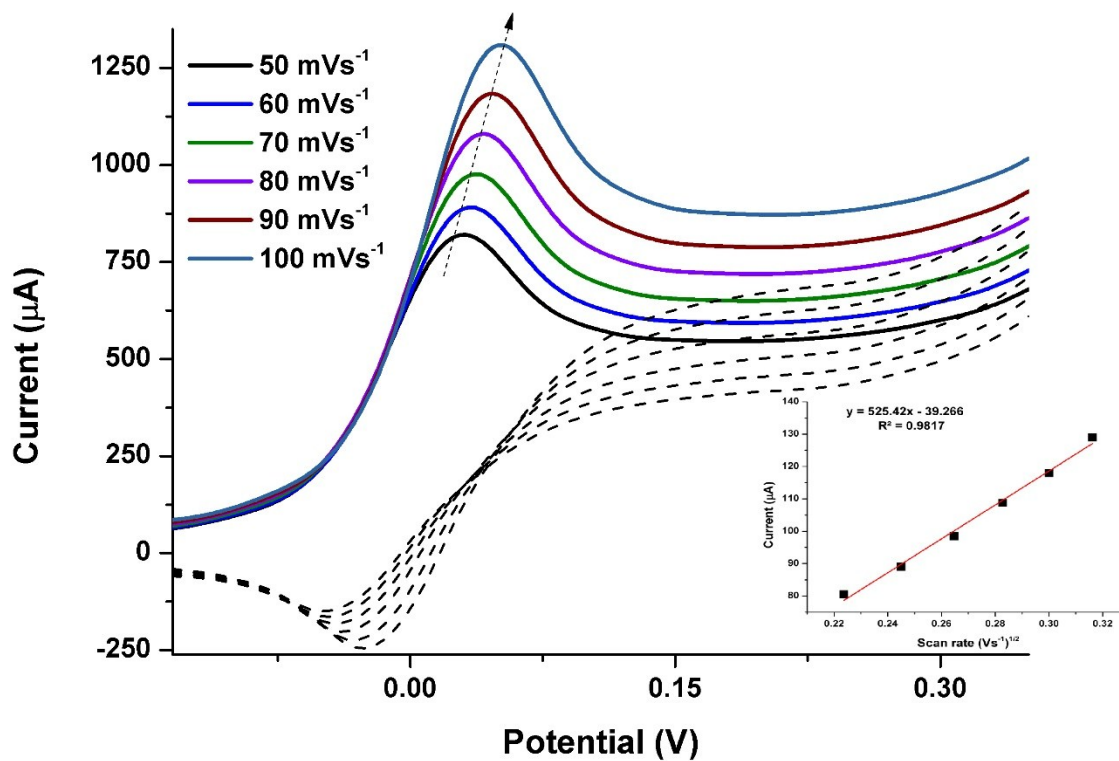

Figure S5 The scan rate measurement for CuO/ITO electrode for 0.01  $\mu\text{M}$  NAC in 0.1 PBS (pH 5.5) in range of 50 to 100  $\text{mVs}^{-1}$ .

Figure S6

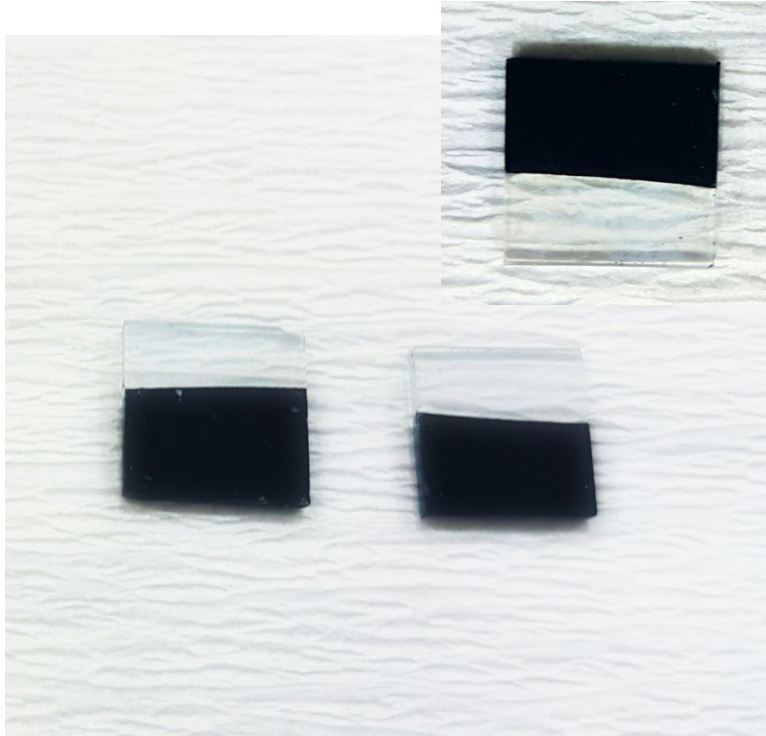

**Figure S6** The microscopic view of the developed CuO/ITO substrates.
